# Supplementary material for: Severe gastrointestinal involvements in patients with adult dermatomyositis with anti-NXP2 antibody
Source: PubMed Central journal article supplement — RMD Open. 2024 Jan 10;10(1):e003901. doi: 10.1136/rmdopen-2023-003901 (PMC10806494; doi:10.1136/rmdopen-2023-003901), 2024-01-10
Supplement: rmdopen-2023-003901supp001.pdf [file rmdopen-2023-003901supp001.pdf]

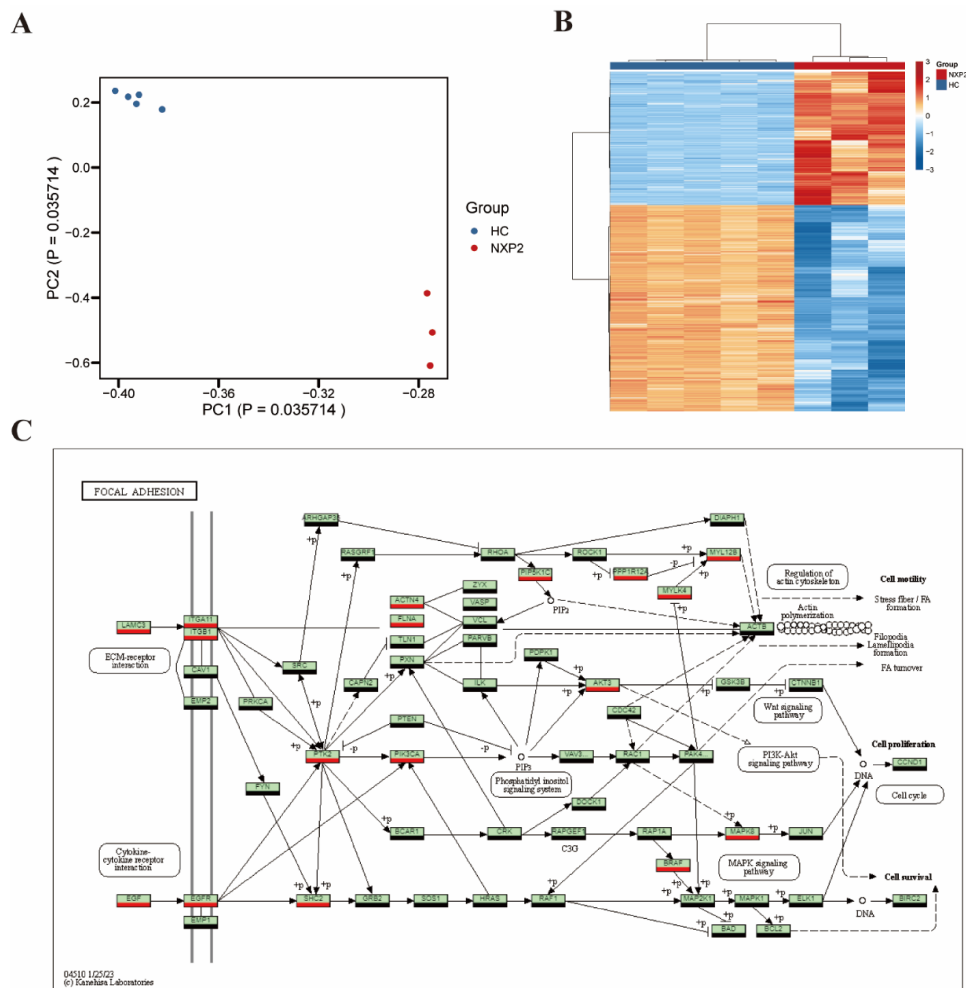

**Fig S1.** PCA plot (A) and heating map (B) indicated the alteration of transcriptomic profiles of NXP2<sup>+</sup>DM patients compared to healthy control. (C) KEGG pathway of focal adhesion was activated in NXP2<sup>+</sup>DM patients

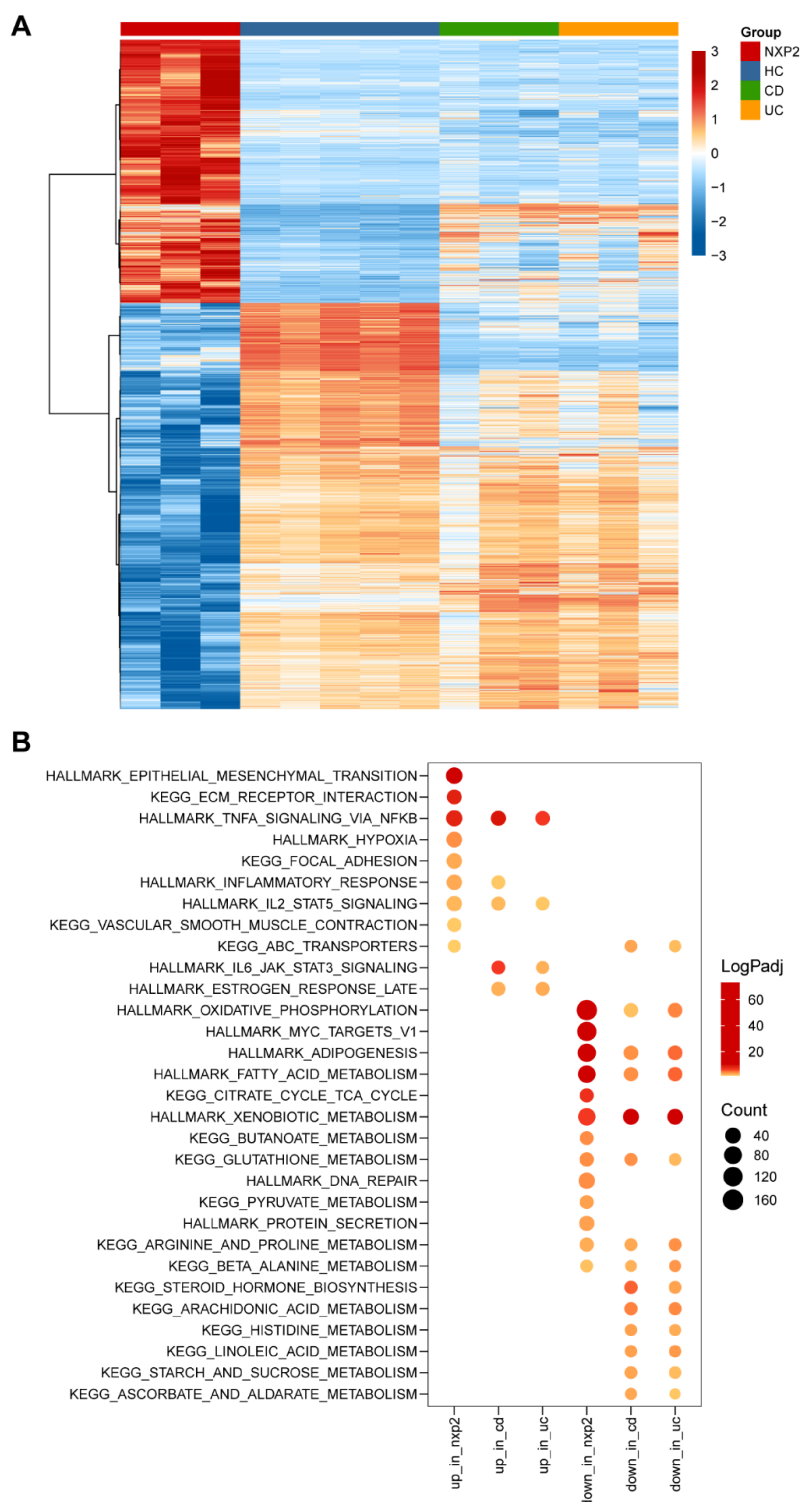

**Fig S2.** (A) The expression profile of NXP2+DM was different from IBD showing in heatmap. (B) Significantly differential gene pathways between NXP2+DM and IBD indicated by functional enrichment analysis. IBD, inflammatory bowel disease; UC, ulcerative colitis; CD, Corhn's disease.

|                                          | Case1                                  | Case2                                                   | Case3                             | Case4                           | Case5                                  | Case6                       | Case7                                                    | Case8                                                        | Case9                                                | Case10                                                        |
|------------------------------------------|----------------------------------------|---------------------------------------------------------|-----------------------------------|---------------------------------|----------------------------------------|-----------------------------|----------------------------------------------------------|--------------------------------------------------------------|------------------------------------------------------|---------------------------------------------------------------|
| <b>demographics</b>                      |                                        |                                                         |                                   |                                 |                                        |                             |                                                          |                                                              |                                                      |                                                               |
| gender                                   | F                                      | F                                                       | F                                 | M                               | F                                      | F                           | F                                                        | F                                                            | F                                                    | F                                                             |
| age (at diagnosis)                       | 64                                     | 75                                                      | 31                                | 48                              | 41                                     | 20                          | 63                                                       | 18                                                           | 29                                                   | 45                                                            |
| age (GI involvements)                    | 64                                     | 75                                                      | 33                                | 49                              | 43                                     | 31                          | 64                                                       | 18                                                           | 29                                                   | 46                                                            |
| disease courses to GI symptoms           | 3 months                               | 4 months                                                | 31 months                         | 14 months                       | 15 months                              | 11 years                    | 9 months                                                 | 5 months                                                     | 7 months                                             | 10 months                                                     |
| duration from GI symptoms to perforation | 2 months                               | 3 weeks                                                 | 2 months                          | 2 weeks                         | 3 months                               | -                           | -                                                        | 3 weeks                                                      | 2.5 months                                           | 2 months                                                      |
| <b>clinical features</b>                 |                                        |                                                         |                                   |                                 |                                        |                             |                                                          |                                                              |                                                      |                                                               |
| cutaneous                                | +                                      | +                                                       | +                                 | +                               | +                                      | -                           | +                                                        | +                                                            | +                                                    | +                                                             |
| muscle                                   | +                                      | +                                                       | +                                 | +                               | +                                      | +                           | +                                                        | +                                                            | +                                                    | +                                                             |
| calcinosis                               | -                                      | -                                                       | +                                 | -                               | +                                      | +                           | +                                                        | +                                                            | -                                                    | +                                                             |
| interstitial lung disease                | +                                      | -                                                       | -                                 | +                               | +                                      | -                           | +                                                        | -                                                            | +                                                    | +                                                             |
| initial GI symptoms                      | abdominal pain                         | abdominal pain, melena                                  | abdominal pain, bloating          | abdominal pain                  | abdominal pain, bloody stools          | melena                      | intractable abdominal pain                               | abdominal pain, vomiting                                     | hematemesis, melena, abdominal pain                  | abdominal pain, hematemesis                                   |
| perforation sites                        | multiple gastroduodenal perforations   | jejunal perforation                                     | ascending colon perforation       | descending duodenum perforation | ileocecal perforation                  | -                           | -                                                        | stomach, duodenal bulb and descending perforations           | jejunal perforation                                  | ascending colon perforation                                   |
| other GI findings                        | retroperitoneal hemorrhage             | gastric ulcer with bleeding, extensive intestinal edema | colon edema                       | duodenum edema                  | colon edema                            | gastric ulcer with bleeding | jejunal ulcer, intestinal edema, mesenteric panniculitis | duodenum bleeding, intestinal edema                          | intestinal edema and upper gastrointestinal bleeding | descending duodenum ulcer with bleeding, extensive intestinal |
| <b>Laboratory findings</b>               |                                        |                                                         |                                   |                                 |                                        |                             |                                                          |                                                              |                                                      |                                                               |
| CK (U/L)                                 | 142                                    | 976                                                     | 166                               | 121                             | 92                                     | 43                          | 92                                                       | 385                                                          | 96                                                   | 107                                                           |
| CRP (mg/L)                               | 62.86                                  | 29.16                                                   | 32.5                              | 14.9                            | 5.39                                   | 3.85                        | 2.34                                                     | 47.78                                                        | 50.25                                                | 5.2                                                           |
| ESR (mm/h)                               | 76                                     | 25                                                      | 69                                | 19                              | 66                                     | 53                          | 31                                                       | 90                                                           | 22                                                   | 70                                                            |
| MSA                                      | NXP2, Mi2 $\alpha$                     | NXP2, Ro52                                              | NXP2                              | NXP2                            | NXP2                                   | NXP2, Ro52                  | NXP2                                                     | NXP2, Ro52                                                   | NXP2, Ro52                                           | NXP2                                                          |
| Infection                                | kebsiella pneumoniae, candida albicans | EBV                                                     | escherichia coli                  | escherichia coli                | CMV, EBV, stenotrophomonas maltophilia | -                           | -                                                        | escherichia coli, pseudomonas aeruginosa, candida tropicalis | -                                                    | Acinetobacter baumannii, candida albicans                     |
| <b>Treatments</b>                        |                                        |                                                         |                                   |                                 |                                        |                             |                                                          |                                                              |                                                      |                                                               |
| previous treatments                      | GCs, TCZ                               | GCs                                                     | GCs, MTX, MMF, Bari, CsA+tofa     | GCs, tha, CyC                   | GCs, CyC, Infi                         | GCs, MTX, tofa              | GCs, CyC, TCZ, tac, bari, Infi                           | GCs, tac                                                     | GCs, MTX, tac, tofa                                  | GCs, tofa                                                     |
| last dosage of GCs before perforation    | Pred 20mg/d                            | MP 80mg/d                                               | MP 160mg/d                        | MP 80mg/d                       | MP 40mg/d                              | -                           | -                                                        | MP 120mg/d                                                   | Pred 20mg/d                                          | MP 40mg/d                                                     |
| surgery                                  | no surgery                             | no surgery                                              | right hemicolectomy and colostomy | perforation repair              | partial ilectomy and ileostomy         | -                           | -                                                        | perforation repair, partial gastrectomy and Roux-en-Y        | perforation repair                                   | no surgery                                                    |
| sequential treatment                     | GCs                                    | GCs                                                     | GCs+sirolimus                     | GCs                             | GCs+tofa                               | GCs                         | GCs+Vedo                                                 | GCs+thalidomide+bari/Vedo                                    | GCs+Vedo                                             | GCs+Vedo                                                      |
| follow-up after perforation/bleeding     | 1 week                                 | 3 weeks                                                 | 3 weeks                           | 1 week                          | 2 years                                | 2 years                     | 1 year                                                   | 14 months                                                    | 3 months                                             | 3 month                                                       |
| outcome                                  | deceased                               | deceased                                                | deceased                          | deceased                        | improved                               | improved                    | improved                                                 | improved                                                     | improved                                             | improved                                                      |

**Table S1. Clinical features of NXP2+ DM with gastrointestinal involvements**

F is for female and M is for male. GCs, glucocorticoids; TCZ, tocilizumab; MTX, methotrexate; MMF, mycophenolate mofetil; Bari, baricitinib; CsA, cyclosporine A; tofa, tofacitinib; tha, thalidomide; CyC, cyclophosphamide; Infi, infliximab; tac, tacrolimus; vedo, vedolizumab.
